1                   **Anatomical tool in the identification of ploids in maize**  
2                   **seedlings and potential use in initial stage of double haploides**  
3                   **obtainment process**

4  
5 Anatomical tool in the identificantion of ploids and potential use of double  
6                   haploides in maize

7  
8 Raquel M. O. Pires<sup>1\*</sup>, Genaina A. Souza<sup>2</sup>, Danielle R. Vilela<sup>1</sup>, Heloisa O. Santos<sup>1</sup>, Renato C.  
9                   C.Vasconcellos<sup>1</sup>, Édila V. R. Von Pinho<sup>1</sup>

10  
11 **1** Department of Agriculture, Universidade Federal de Lavras, Lavras, Minas Gerais, Brazil,

12 **2** Department of Vegetal Biology. Universidade Federal de Viçosa, Viçosa, Minas Gerais,  
13 Brazil.

14  
15 \*Corresponding author

16  
17 E-mail: [raquelmopires@ufla.br](mailto:raquelmopires@ufla.br)

## 26 **Abstract**

27 Studies that optimize the haploid technique in the removal of maize lines are necessary.  
28 Between the stages that mostly requires attention and it is directly related to the success of  
29 the technology is the correctly separation of induced haploids and diploids. Morphological  
30 markers are commonly used but have strong influence of the environment, and laboratory  
31 methods have been developed and may be more efficient. Thus, the objective was to study  
32 the use of the anatomical analysis tool, through the analysis of young maize leaf for use as  
33 the indirect markers in the identification of ploidy. The hybrids were crossed with the KEMS  
34 haploid inducer. The seeds crossed, were selected according to the R-navajo marker and  
35 submitted to two different protocols of chromosome duplication. Plants that survived to the  
36 duplication protocols were acclimated in greenhouse and then transferred to the field. After  
37 the self-pollination of the DH0 plants, the DH1 seeds were taken to the field, divided into  
38 treatments according to the parentals and duplication protocols. At the vegetative stage V4 of  
39 the plants, leaf tissue samples were collected to the evaluation of the amount of DNA and  
40 identification of ploidy and anatomical analysis. The nuclear DNA review of each sample  
41 was performed for the comparison in histograms of the position of G1 peak to the G1 peak of  
42 the internal or external reference standard. A high accuracy came to validate an anatomical  
43 tool, through the variables studied in this work, as a marker in the differentiation of ploidy in  
44 maize plants, and it can be used in selection programs. The anatomy made in some letters is  
45 a non-destructible technique and, together with a flow cytometry technique, can be used as  
46 an indirect method in haploid cutting programs at the initial stage of the identification of  
47 seedlings.

48

49

50

51

## 52 Introduction

53 The success of a breeding program that aims at the production of maize commercial  
54 hybrids lies in the fact of obtaining elite lines. Among all the steps, this is considered to be  
55 the most time-consuming and costly, and the technology of double haploid emerges as a  
56 way of reducing time in obtaining these lines [1].

57 The rapid production of homozygotic lines allows a better exploitation of genetic  
58 variability and increases the efficiency of selection. Homozygous plants will have the  
59 maximum additive variance, the effects of dominance and epistasis, and the advantages in  
60 the selection of quantitative, superior characteristics [2]. In addition, the decrease of the  
61 costs with labor, use of smaller experimental area and anticipation of profits in commercial  
62 programs for maize breeding have made this technique a great success.

63 The production of double- haploid lines involves four main steps: in vivo induction of  
64 haploidy, identification of possible haploids, chromosome doubling and the self-fertilization of  
65 lines obtained for increment of seeds [3]. However, the success of this methodology is still  
66 dependent on the use of inductors with high capacity of induction, a precise system of  
67 identification and differentiation of haploid and diploid seeds, as well as efficient and  
68 reproducible protocols of chromosome doubling [4].

69 The doubling of the chromosome number spontaneously or induced by the application of  
70 mitotic agents e.g., colchicine, retrieves the diploid condition and restores fertility [5]. The  
71 action mechanism of colchicine involves the irreversible connection to tubulin dimers,  
72 causing a conformational change and preventing the polymerization of mitotic spindle, and  
73 as a result, the newly duplicated chromosomes are not separate and the core reorganizes  
74 with the number of duplicated chromosomes [6]. However, not all cells of the treated tissue  
75 polyploidize, which can lead to the formation of chimeras, i.e., tissues or plants with duplicate  
76 sectors and others unduplicated ones [7] called mixoploids. Truly duplicated lines resulting  
77 from this process are called duplicate or double haploids (DHs).

78        There are several methods for certification of polyploidization, being flow cytometry the  
79        most used one [8]. Flow cytometry is a reliable and fast method, because it allows the  
80        analysis of a large number of cells and of different tissues [9]. In experiments with double  
81        haploids, flow cytometry allows vigorous seedlings and detected as diploids in the  
82        histograms are discarded before the step of field, reducing time and space. In addition, flow  
83        cytometry allows the analysis of the efficiency of the protocol of chromosome doubling, since  
84        it is not possible to confirm if the response of seedlings to duplication was positive [10–12].

85        Another tool that is being studied as a marker in the differentiation of ploidies in plants is  
86        the leaf anatomy, being the leaf considered the component with greater ability to adapt to  
87        environmental conditions. Highly flexible, leaf anatomy is influenced by environmental  
88        factors, such as, irradiation (leaves of sunlight/shade, [13], nutrients [14], drought [15] and  
89        ozone [16,17]. Changes in the leaves characteristics, such as those related to the thickness  
90        of the leaf blade, parenchymas, epidermis and number of stomata for example, and that are  
91        highly associated with the photosynthetic potential of plants, are used in studies of genetic  
92        selection by the use of morphological and anatomical markers. Additionally, they are highly  
93        heritable characteristics, i.e., can be passed to their offspring [18].

94        The cytoanatomic characterization is a methodology that allows the identification of  
95        haploid and supposed polyploidy in plants subjected to chromosome doubling. The study of  
96        measurement and comparison of stomata, based on the principle that the length of the same  
97        normally increases with the number of chromosomes, is the most commonly cited in the  
98        literature [19].

99        The number of stomata in association with other leaf anatomical characteristics, has  
100        already been mapped to different levels of ploidy in studies with coffee plants [20]. For this  
101        species, the greater the number of stomata the higher the ploidy. In the case of *Coffea*  
102        *canephora*, a reduction in the stomatal density is higher in the tetraploid level for some  
103        cultivars [20]. [21], observed in Citrus that the size and density of stomata varied according to  
104        ploidy level, where the triploids showed a higher number of stomata when compared to

105 diploid plants. A similar result was observed by [22], who stated to be possible the use of  
106 anatomical markers for purposes of selection of citrus with different levels of ploidy.

107 Ploidy is well studied from the point of view of genetics and genomic perspective, but the  
108 morphological and anatomical aspects related to these differences in the amount of DNA,  
109 remain poorly studied in maize plants. Analyzing the anatomical characteristics of young  
110 leaves of maize, capable of discriminating the different ploidies and extrapolate these results  
111 in diploid and haploid discrimination on the optimization of the process of obtaining double  
112 haploid is of extreme importance.

113 Thus, the objective of this work was to study the use of anatomical tool, through the  
114 analysis of the characteristics of young leaves of maize for use as indirect markers in the  
115 identification of ploidies, and through future studies, to extrapolate the use of this marker in  
116 the identification of haploids in the initial stage of the process of obtaining double haploids.

117

## 118 **Material and methods**

119 The seeds used in this work were obtained from an experiment previously developed by  
120 [23] through the cross between four simple hybrids (DKB393, GNS 3225, GNS 3264, GNS  
121 3032) with the haploid inducer KEMS, used as male parental. Seeds from these crosses  
122 were separated by staining of the embryo and endosperm and selected as possible haploids  
123 according with the marker R-navajo [24].

124 The authors submitted the haploid seeds to two chromosome duplication protocols, and  
125 the plants that survived the field, called DH0, that produced pollen and had stigma style in  
126 synchronism, were self-fertilized, resulting in DH1 generation.

127 Thus, in this present work, in order to evaluate the maintenance of DH in future  
128 generations, the DH1 ears were harvested and the seeds threshed and dried at room  
129 temperature up to 12% moisture level at the point of physiological maturity. The seeds were  
130 then mixed and divided into treatments as shown in Table 1. These seeds were then stored  
131 in a cold chamber at 10 ° C until the following experiments were carried out.

132 **Table 1.** Treatments taken for the field in the harvest season 2014/2015, established in  
133 accordance with the parental and the protocols of chromosome doubling.

| <b>Materials Identification</b> |                |                  |
|---------------------------------|----------------|------------------|
| <b>Treatments</b>               | <b>Hybrids</b> | <b>Protocols</b> |
| 1                               | DKB393         | 1                |
| 2                               | DKB393         | 2                |
| 3                               | GNS3225        | 1                |
| 4                               | GNS3225        | 2                |
| 5                               | GNS3264        | 1                |
| 6                               | GNS3264        | 2                |
| 7                               | GNS3032        | 1                |
| 8                               | GNS3032        | 2                |

134

135 In the harvest season 2014/2015, the total number of seeds DH1 for each treatment,  
136 was taken to the field and the experimental design was a randomized complete blocks with  
137 eight treatments with four replications. Each block was composed by lines of 10 meters of  
138 length, with spacing of 80 cm between rows and among plants of 25 cm, and sowing of a  
139 seed per hole. The collection of leaf material occurred in young stage of the plant maize, with  
140 4 replicates collected at random within each treatment.

141 In the case of leaf anatomy, 5 replicates were performed for each repetition in the  
142 laboratory, five blades of 10 sections each, were made, and the top five fields were  
143 photographed and subsequently measured. The following were measured: thickness of the  
144 leaf blade (ELF), thickness of the parenchyma (PAR), thickness of the upper epidermis  
145 (EES) and lower epidermis (EEI), polar diameter of the stomata in the upper face (DPS) and  
146 lower (DPI), equatorial diameter of the stomata of superior face (DES) and lower face (DEI)  
147 and stomatal density on the upper surface (DS) and lower (DI). For that, in the vegetative

148 stage V4 which corresponds to the development of four leaves, leaf tissue samples were  
149 collected.

150 For that, in the vegetative stage V4 which corresponds to the development of four  
151 leaves, leaf tissue samples were collected.

152 For both evaluations, the medial portion of the young leaves fully developed, was cut  
153 into segments of approximately 3 cm in length and wrapped in aluminum paper duly  
154 identified per plant. Aluminum papers remained in a polystyrene box containing recyclable  
155 crushed ice, until the time of transportation to the laboratory of tissue culture of plants of the  
156 Department of Agriculture of UFLA.

157 At the opening of each envelope of aluminum, part of the samples of leaf tissue was  
158 used for the quantification of DNA and part to the anatomical analysis. Therefore, young leaf  
159 tissue samples of maize were crushed under ice, in Petri plates containing 1 mL of cold  
160 buffer LB01, to obtain nuclear suspension [25], which was added 2,5µL RNase and stained  
161 with 25 µL of propidium iodide (1 mg mL<sup>-1</sup>). The species *Vicia faba* (quantity of DNA of 26.9  
162 pg/2C) was used as an external standard of reference and for each sample at least 10  
163 thousand cores were analyzed. Each suspension was analyzed in flow cytometry  
164 FacsCalibur (Becton Dickinson). The histograms obtained were evaluated by the WinMDI  
165 software 2.8 (2009) for the evaluation of the peaks of DNA. The estimate of the nuclear DNA  
166 content (pg) of each sample was performed by comparing the position of the peak G1 with  
167 the peak G1 of the internal standard or external reference.

168 For this comparison the following expression was used:

169

$$170 \quad Q = \left(\frac{E}{S}\right) \times R \quad (1)$$

171

172 Where:

173 Q is the quantity of DNA of the evaluated sample (pg/2C).

174 E is the position of the G1 peak of the sample.

175 S is the position of the peak G1 reference standard and

176 R is the quantity of DNA of the standard sample (26.9 pg/2C).

177 By the quantity of DNA it was possible to make inferences about the ploidy level of the  
178 evaluated genotypes.

179 As mentioned, the other part of the samples of leaf tissue was immediately fixed in  
180 FAA<sub>50</sub>, (formaldehyde: acetic acid: ethanol, 5:5:90) for 48 h. Then, the samples were  
181 removed from the fixative solution, rinsed and stored in 70% ethanol solution [26]. At this  
182 moment the samples were transported to the Laboratory of Anatomy and morphogenesis of  
183 Plant Biology Department of the Federal University of Viçosa, where permanent slides were  
184 made using portions of the leaf that were dehydrated in ethyl series included in historresin  
185 (methacrylate), according to the manufacturer's recommendations. Transverse sections of  
186 leaf were sectioned in automatic advance rotary microtome (model RM2155, Leica  
187 Microsystems Inc., Deerfield, USA) with 5 µm thick, arranged on histological slides and  
188 stained with toluidine blue [27], to the limbal micro morphometry.

189 For the stomata evaluations, fragments of the central part of the leaf blade were  
190 sectioned from material stored in alcohol 70%. The samples were clarified by means of the  
191 technique of Diaphanization, described by [28] and modified for the species, having been  
192 clarified in methanol for 48 hours and then in lactic acid for 6 hours in water bath for 98 °C  
193 and assembled into lactic acid. After the staining procedure, the samples were immersed in  
194 ethanol 80, 70 and 50%, and later were rinsed in distilled water. The histological slides with  
195 leaf fragments were mounted on glycerol-jelly Images of the slides of cross cuts and  
196 diaphanization were obtained under a light microscope (model AX-70 TRF, Olympus Optical,  
197 Tokyo, Japan) coupled to a digital camera (model Zeiss AxioCam HRc, Göttinger, Germany)  
198 and a microcomputer with the program to capture images Axion Vision, having been digitized  
199 and stored in a microcomputer. For the analysis, 10 distinct fields of each sample were  
200 measured by means of Image-Pro® Plus software (version 4.1, Media Cybernetics, Inc.,  
201 Silver Spring, USA).



202 The analyzes were performed for all characters with the estimation of variance  
203 components and the prediction of random effects using the approach of mixed models, the  
204 method of restricted maximum likelihood/best linear unbiased prediction (REML/BLUP) [29].  
205 For this, the following statistical model was used:

206

$$207 \quad y = Xr + Za + Wp + e \quad (2)$$

208

209 Where:

210  $y$ : vector of data;

211  $R$ : vector of the effects of repetition (assumed as fixed) added to the overall average;

212  $A$ : vector of genotypic effects among treatments (random), being  $a \sim \text{NMV}(0, I\sigma_g^2)$ .  $\sigma_g^2$   
213 is the variance associated with genotypic among treatments;

214  $p$ : vector of genotypic effects among treatments (random), being  $p \sim \text{NMV}(0, I\sigma_p^2)$ .  $\sigma_p^2$

215 is the variance associated with the parcels effects;

216  $e$ : vector of random errors, and  $\sim \text{NMV}(0, I\sigma_e^2)$ .  $\sigma_e^2$  is the variance associated with  
217 the residual effects;

218  $X$ ,  $Z$  and  $W$ : incidence matrices for  $r$ , and  $p$ , respectively.

219 The heritability in the average of treatments ( $h_m^2$ ) and accuracy were estimated, and  
220 the significance of the random effects as the genotypic variance among treatments ( $\sigma_g^2$ ) were  
221 tested by the *Likelihood Ratio Tests* (LRT) where the analyses of deviance were obtained for  
222 each character evaluated [30].

223 These statistical analyzes were performed using the software SELEGEN-  
224 REML/BLUP [29].

225

## 226 Results

227 For all the evaluated characteristics the accuracy was classified as very high [31],  
228 with values above 87.0%. On average, the heritability ( $h_m^2$ ) of the characteristics was also  
229 high with values above 84.0%, what indicates good reliability of data (Table 2). The  
230 heritabilities of treatments ranged from 76.0% (EES) to 98.0% (DEI) among the evaluated  
231 characteristics, which demonstrates that in the anatomic evaluation in this experiment, the  
232 largest part of the variation observed is due to genetic causes to the detriment of  
233 environmental variations [32].

234 The genotypic variance was highly significant by the LRT test and likelihood ratio for  
235 the characters related to the thickness of the leaf blade (ELF), stomatal density of both the  
236 upper surface (DS), as well as the lower surface (DI), thickness of the parenchyma (PAR),  
237 thickness of the upper epidermis (EES) and lower epidermis (EEI), polar and equatorial  
238 diameter of upper epidermis (DES and DPS) and lower (DEI and DPI), according to LRT ( $P$   
239  $< 0.01$ ), characterizing these characteristics as good candidates to be inserted in a breeding  
240 program as markers. It was possible to realize that the characteristics related to the  
241 thickness of the lamina and those related to the stomata were the ones that showed higher  
242 heritability, followed by the thickness of the parenchyma. The thickness of the epidermis,  
243 even with high heritability, were lower (Table 2).

244 **Table 2. Summary of ANADEV and estimates of genetic parameters in the evaluation of maize hybrids for traits.** Thickness of the leaf  
 245 blade (ELF), thickness of the upper epidermis (ESS), thickness of the parenchyma (PAR), thickness of the lower epidermis (EEI), equatorial  
 246 diameter of the stomata in the upper face (DES), polar diameter of the stomata in the upper face (DPS), Equatorial surface of the stomata in the  
 247 lower face (DEI), polar diameter of the stomata of the lower phase (DPI) and stomata densities of upper surfaces (DS) and lower (DI) of the  
 248 leaf.

| Parameters                               | ELF       | EES       | PAR       | EEI       | DES       | DPS       | DEI       | DPI       | DS                   | DI      |
|------------------------------------------|-----------|-----------|-----------|-----------|-----------|-----------|-----------|-----------|----------------------|---------|
| $VG_{\text{between}} (\hat{\sigma}_g^2)$ | 0.000235* | 0.000011* | 0.000092* | 0.000007* | 0.000013* |           | 0.000024* | 0.000011* | 44.539206*           | 286.20* |
| LRT among treatments                     | *         | *         | *         | *         | *         | 0.00001** | *         | *         | *                    | *       |
| $VG_{\text{within}} (\hat{\sigma}_p^2)$  | 82.36     | 14.84     | 60.19     | 28.25     | 134.79    | 125.70    | 200.61    | 189.59    | 20.36                | 67.65   |
| LRT within treatment                     | 0.000002  | 0.000001  | 0.000001  | 0.000000  | 0.000000  | 0.000000  | 0.000000  | 0.000000  | 0.8338 <sup>ns</sup> | 1.2856  |
|                                          | ns        | ns        | ns        | ns        | ns        | ns        | ns        | ns        | ns                   | ns      |
| $h^2_{\text{mg}} (\%)$                   | 0.00      | 0.01      | 0.00      | 0.00      | 0.01      | 0.01      | 0.07      | 0.00      | 0.01                 | 0.00    |
| $AC_{\text{gen}} (\%)$                   | 93.2**    | 76.2**    | 91.0**    | 84.2**    | 96.8**    | 96.2**    | 98.1**    | 97.3**    | 84.8**               | 94.9**  |
|                                          | 96.6      | 87.3      | 95.4      | 91.8      | 98.4      | 98.1      | 99.0      | 98.7      | 92.1                 | 97.4    |

249 \*\* Significant and <sup>ns</sup> Non significant by the likelihood ratio test (LTR), with 1% of probability.

250

251 The anatomical differences observed were obtained through anatomical cuts  
 252 and diaphanization of samples. It was possible to observe a difference in leaf blade as  
 253 the thickness (Fig 1) and quantity and size of the stomata (Fig 2).

254

255 **Fig 1. Cross-sectional cuts of maze leaves collected after a process of**  
 256 **chromosome doubling with use of colchicine.** Haploid material (A), diploid (B),  
 257 Double haploid (C), triploid (D) and tetraploid (E). ELF= thickness of leaf blade, PAR=  
 258 thickness of parenchyma, EP=epidermis and ES= stomata. The bars represent 50  $\mu$ m.  
 259

260 **Fig 2. Adaxial surface (A to E) and abaxial (F through J) of maze leaves collected**  
 261 **after a process of chromosome doubling with use of colchicine.** Haploid material  
 262 (A and F), diploid (B and G), Double haploid (C and H), triploid (D and I) and  
 263 tetraploid (E and J). The bars represent 50  $\mu$ m and arrows indicate stomata.  
 264

265 In Table 3, it is observed that the treatment 7 presented the highest values of  
 266 ELF, ESS, EEI and held until the third position in the ranking for PR, DEI, DS. While  
 267 the treatment 6 occupied until the second position to ELF, ESS, PR, DPS and DPI. The  
 268 treatments 1 and 5 occupied the last two positions to ELF, EES, PR, EEI, DES, DPS,  
 269 DEI and DPI.

270

271 **Table 3. Genotypic averages and ranking of treatments for the anatomical**  
 272 **characteristics related to leaf blade.** Leaf blade thickness (ELF), thickness of the  
 273 upper epidermis (ESS), thickness of the parenchyma (PAR), thickness of the lower  
 274 epidermis (EEI), equatorial diameter of the stomata in the upper face (DES), polar  
 275 diameter of the stomata in the upper face (DPS), polar and equatorial diameter of the  
 276 stomata in the lower face (DEI) and (DPI), stomatal density of the upper surfaces (DS)  
 277 and lower (DI) of maze leaves collected after a process of chromosome doubling with  
 278 use of colchicine.  
 279

| ELF    |                | EES    |                | PAR    |                | EEI    |                | DES    |                |
|--------|----------------|--------|----------------|--------|----------------|--------|----------------|--------|----------------|
| Treat. | $\bar{X}$ BLUP | Treat. | $\bar{X}$ BLUP | Treat. | $\bar{X}$ BLUP | Treat. | $\bar{X}$ BLUP | Treat. | $\bar{X}$ BLUP |
| 7      | 0.1375         | 7      | 0.0305         | 6      | 0.0858         | 7      | 0.0234         | 8      | 0.0378         |
| 6      | 0.1334         | 6      | 0.0284         | 7      | 0.0843         | 3      | 0.0215         | 3      | 0.0075         |
| 3      | 0.1237         | 2      | 0.0284         | 3      | 0.0761         | 8      | 0.0208         | 1      | 0.0075         |
| 8      | 0.1211         | 3      | 0.0284         | 8      | 0.0760         | 6      | 0.0189         | 4      | 0.0075         |
| 2      | 0.1112         | 8      | 0.0261         | 4      | 0.0664         | 2      | 0.0188         | 2      | 0.0075         |
| 4      | 0.1062         | 4      | 0.0249         | 2      | 0.0654         | 4      | 0.0173         | 7      | 0.0075         |
| 1      | 0.0957         | 5      | 0.0238         | 1      | 0.0621         | 1      | 0.0160         | 6      | 0.0075         |
| 5      | 0.0932         | 1      | 0.0218         | 5      | 0.0586         | 5      | 0.0155         | 5      | 0.0075         |
| Mean   | 0.1152         | -      | 0.0266         | -      | 0.0719         | -      | 0.0190         | -      | 0.0113         |
| DPS    |                | DEI    |                | DPI    |                | DS     |                | DI     |                |
| Treat. | $\bar{X}$ BLUP | Treat. | $\bar{X}$ BLUP | Treat. | $\bar{X}$ BLUP | Treat. | $\bar{X}$ BLUP | Treat. | $\bar{X}$ BLUP |
| 8      | 0.0315         | 8      | 0.0433         | 8      | 0.0325         | 5      | 60.5125        | 5      | 110.2138       |

|      |        |   |        |   |        |   |         |   |         |
|------|--------|---|--------|---|--------|---|---------|---|---------|
| 6    | 0.0270 | 3 | 0.0369 | 6 | 0.0284 | 1 | 51.5084 | 1 | 93.7531 |
| 3    | 0.0260 | 7 | 0.0326 | 3 | 0.0277 | 7 | 51.4221 | 4 | 93.4814 |
| 5    | 0.0238 | 6 | 0.0320 | 2 | 0.0240 | 6 | 51.2206 | 7 | 82.2563 |
| 7    | 0.0233 | 1 | 0.0300 | 5 | 0.0235 | 4 | 49.0210 | 6 | 78.8012 |
| 4    | 0.0233 | 2 | 0.0291 | 4 | 0.0235 | 3 | 46.3618 | 2 | 73.8440 |
| 2    | 0.0230 | 5 | 0.0288 | 7 | 0.0236 | 2 | 43.5809 | 3 | 70.7177 |
| 1    | 0.0213 | 4 | 0.0286 | 1 | 0.0214 | 8 | 37.8325 | 8 | 51.1355 |
| Mean | 0.0249 | - | 0.0326 | - | 0.0255 | - | 48.9325 | - | 81.7754 |

280

281 The importance or contribution of each analyzed variable as a possible marker  
 282 in the separation of the tested plants, demonstrates greater relevance of the thickness  
 283 of the leaf blade and the stomata, while the thickness of epidermis little contributed to  
 284 the separation of plants. (Fig 3).

285

286 **Fig 3. The relative importance of the characteristics evaluated in the separation**  
 287 **of the valuated materials.**

288

289 In parallel to the anatomical analyzes and with the aim of inferring the real  
 290 ploidies observed in the tested materials, the DNA quantification was performed by flow  
 291 cytometry technique in 32 selected plants (Table 4). The histograms obtained by this  
 292 method allows for the identification of the ploidy level of the individuals tested through  
 293 the location of the G1 peak of the sample on the axis of the relative intensity of  
 294 fluorescence (Fig 4). The dominant peaks generated in the histograms are relative to  
 295 the quantity of DNA of the cores in the G1 phase of the cell cycle. The estimate of the  
 296 ploidy level is done by comparing the G1 peaks of the histogram of a sample with the  
 297 peak of a plant-standard with known ploidy [25].

298 Maize diploids have the peak G1, located in the region of relative intensity of  
 299 fluorescence, soon after the mark of  $10^2$  (Fig 4A). The haploids have lower relative  
 300 intensity of fluorescence and the peak G1 is located to the left of the mark of  $10^2$ , i.e.,  
 301 dislocated in the direction of the x axis (Fig 4B). Whereas the triploids and the  
 302 tetraploids have still greater intensity than the diploids, locating at the right of the mark  
 303 of  $10^2$  and with higher peaks (fig not shown). Whereas the Double haploid plants, are  
 304 those that have ploidies haploid/diploid type (Fig 4C).

305 Usually, an association of the histogram obtained with a histogram of a  
 306 standard plan is performed, for example, *Vicia faba*, used by [10,11,33]. The use of  
 307 standard allows to obtain the quantity of DNA contained in the sample.

308

309 **Fig 4. Histograms of ploidies detected by flow cytometry in maize plants**  
 310 **collected after a process of chromosome doubling with use of colchicine. A.**  
 311 **Diploid Plant B. Haploid Plant. C. Double haploid Plant.** Vertical axis = number of  
 312 read cores; horizontal axis = relative intensity of fluorescence. The arrows show the  
 313 peaks G1 and G2 and the external standard of reference.  
 314

315 **Table 4. Identification of the ploidy level in agreement with the analysis of flow**  
 316 **cytometry and flow of 32 plants evaluated divided by treatment.**

317

| Treatments | Ploidies found                                  |
|------------|-------------------------------------------------|
| 1          | Haploid<br>Haploid<br>Haploid<br>Double haploid |
| 2          | Haploid<br>Diploid<br>Diploid<br>Diploid        |
| 3          | Diploid<br>Diploid<br>Haploid<br>Diploid        |
| 4          | Haploid<br>Diploid<br>Diploid<br>Haploid        |
| 5          | Haploid<br>Haploid<br>Haploid<br>Haploid        |
| 6          | Diploid<br>Diploid<br>Diploid<br>Diploid        |
| 7          | Diploid<br>Diploid<br>Diploid<br>Diploid        |
| 8          | Triploid<br>Triploid<br>Diploid                 |

318

319

## 320 **Discussion**

321           It was possible through the analysis of mixed model to verify the existence of  
322 variability in the anatomical characteristics, i.e., there is a difference among the tested  
323 materials ( $P < 0.01$ ) (Table 1). In addition, these variables showed a quality required for  
324 insertion in a breeding program, with the aim of separation of evaluated materials [34].  
325 The heritability and accuracy obtained were high in accordance with the classification  
326 made by [31] (Table 1). The fact of the evaluated anatomical characteristics have  
327 potential for use in selection programs is of extreme importance, since these  
328 characteristics may be associated with the photosynthetic potential of plants, i.e., the  
329 productive capacity of plant material, leaves, roots and seeds.

330           The thickness of the leaf blade (ELF), has a crucial role not only in the capacity  
331 of carbon fixation by the chloroplasts of the palisade parenchyma, but also by the  
332 internal storage of  $\text{CO}_2$  by sponge parenchyma [35]. While the stomata are the  
333 channels of influence of  $\text{CO}$  and the flow of water vapor. For the plants to be effective,  
334 they must balance the gaseous exchanges carried out through these structures to  
335 maximize the absorption of  $\text{CO}_2$  for photosynthesis and minimize the loss of water  
336 through transpiration. Thus increasing the efficiency of the use of the water and  
337 consequently the plasticity of the plant in the face of environmental changes. A  
338 program that aims at obtaining hybrids with greater adaptive capacity, seems a major  
339 bottleneck of agriculture through the global climate changes [36].

340           The stomata behavior, therefore, controls the volume of  $\text{CO}_2$  in the intercellular  
341 spaces of the leaf for photosynthesis. Even if the maze as plant of  $\text{C}_4$  metabolism is  
342 able through the mechanisms of  $\text{CO}_2$  concentration, to maintain an adequate quantity  
343 of C for photosynthesis [37], the stomatal density and the size of the stomata are

344 important characteristics to maximize efficiency. Once that, in spite of the area of the  
345 pores of the stomata represent less than 3% of the total area of the leaf, about 98% of  
346 all the absorbed CO<sub>2</sub> and water lost occurs by these pores [38].

347         The anatomical characteristics of the stomata define the stomatal conductance  
348 (*gs*), theoretical maximum [39], i.e., the functionality of the same and also influence the  
349 speed of response. The *maximum gs* relates to the size and density of stomata, which  
350 can be influenced by the environment of growth [40,41]. However, as in this study, all  
351 the plants were grown in the same environment, we can consider that the density and  
352 the pattern of size, influenced by the atmospheric concentration of CO<sub>2</sub>, water  
353 availability [42] and light [43], varied according to the genetic characteristics of each  
354 tested hybrid. This reinforces the importance of the anatomical characters as early  
355 markers of separation of hybrids used in this study.

356         Experimental evidences showed that the density of stomata is negatively  
357 correlated with the stomata size [40,41]. The interaction/correlation among stomata  
358 size and density, and the impact on stomatal function has received much attention,  
359 particularly with reference to the evolution of the performance and plasticity in plants  
360 [41]. Evidence from several studies have also suggested that smaller stomata respond  
361 faster than larger stomata, an observation that has been explained in the context of  
362 relations surface-volume and the requirement for ck to boost the movement [44].

363         The selection of plants grown with changes in the density of stomata to increase  
364 the performance of plants has been widely exploited [38,45], with limited success. The  
365 increase of the stomatal density can increase the *gs* and the photosynthetic rate can  
366 become 30% greater in conditions of high brightness [46].

367         The increase of photosynthesis can encourage the increase in weight, as  
368 already mentioned. Increase in the weight of seed has also been associated with  
369 induced polyploidy [47]. What can potentiate the vigor and germination of seeds,  
370 favoring the formation of a more homogeneous stand. However, the manipulation of



371 functional stomate responses is clearly more complicated, requiring a thorough  
372 understanding of the metabolism of the manipulated plant.

373 The use of these anatomical characteristics of the leaf is widely used for  
374 identifying the levels of ploidy in many species of plants, such as alfalfa [48],  
375 *Gossypium* [49], *Dactylis* [50], ryegrass [51], wheat [52] and *Bromus inermis* [53,54]. In  
376 coffee the density of stomata decreased while its size increased with an increase in the  
377 ploidy level, with the lower density found in the tetraploids and higher in the diploids  
378 [20]. Genotypic differences in stomatal frequency and length of the guard cells were  
379 also observed in barley [55], soybean [56] Triticale [57,58]. These studies demonstrate  
380 the possibility of the use of anatomical markers with mechanism for identification of  
381 ploidy.

382 In the present, it is verified the contribution of the ten variables evaluated in  
383 separate studied plants and coincides with what is reported in the literature in relation  
384 to the great importance of the stomata. Carefully observing the relative contribution of  
385 each trait, it is verified that the variables associated to the stomata represent,  
386 altogether, approximately 50% of the contribution of separation (Fig 3).

387 The high contribution of leaf blade is due to its constitution. The leaf blade is  
388 composed by parenchyma, in which chloroplasts and spaces for CO<sub>2</sub> storage are  
389 located, in addition of course, all the other components of the leaf. Therefore its  
390 relevance is easily understandable and the importance of variables related to the  
391 stomata is also evident, reinforcing what is already described in several academic  
392 articles.

393 In addition it is possible to suggest that the anatomic variables, as possible  
394 markers were efficient on grouping even partially the hybrids (Tables 2 and 3).  
395 Behavior that reinforces what has been described above, where the traits were efficient  
396 anatomical markers for various crops. The treatments that showed higher averages for  
397 the analyzed variables were classified as diploids (Table 3), in general with averages  
398 exceeding the haploids (Table 2).

399           The increase in ploidy level may be the main driving force to facilitate the plants  
400 breeding, as it provides important phenotypic effects, such as increasing the size of the  
401 cells and organs, and sometimes a larger force and biomass, and additional molecular  
402 and phenotypic variation that may arise soon after the formation of the polyploids. This  
403 behavior can be attributed to the effect "gigantism", in which plants with higher ploidy  
404 may have increased the size of their structures [19]. The treatments 6 and 7 (diploids),  
405 for the characteristics related to leaf blade (ELF and PAR), showed higher averages to  
406 the haploids (Table 2). However the effect "gigas" was not observed to hybrids tri and  
407 tetraploids, as reported in *bulbophyllum ipanemense* [59].

408           Significant effects on the ploidy level, and the anatomical and morphological  
409 characteristics, such as leaf dry mass and thickness of the epidermis, have already  
410 been reported in Brassicas [60] and characteristics such as leaf thickness and  
411 photosynthetic rate, for rice [61]. The increase in the leaves thickness and total mass of  
412 plants may result in greater energy expenditure, however, as the maize is a plant of  
413 Kranz anatomy, there is not so much spent on histodifferentiation of juxtaposed layers  
414 of palisade parenchyma, since these cells are found around the cells of the sheath of  
415 the beam. Therefore the gain in leaf thickness would contribute not only to the increase  
416 of the total mass of the leaf, but also to the increase of empty spaces. These spaces  
417 play an important role in the CO<sub>2</sub> reserve for photosynthesis and because it does not  
418 require energy to histodifferentiation, being less costly in terms of energy.

419           The size of the cells and the thickness of the components were positively  
420 correlated with the ploidy level also in potatoes [62]. With the increase of the genome,  
421 the gigantism in cells and organs is widely observed and associated with the  
422 increments in the photosynthetic rate [63]. The increase of photosynthesis is attributed  
423 to the increase of the tissues, increased capacity for storage of CO<sub>2</sub>, and increase of  
424 *gs*. The size of the epidermal cells, cells, can also be associated with the ploidy level of  
425 the material under observation [47]. In addition to the increase in the activity of multiple  
426 enzymes such as hydrolases and expansins [64].

427           The effect "giga" was also related in previous studies with modifications of cell  
428 wall through a loosening, which enables a higher rate of growth of plants and  
429 phenotypic changes. This loosening is assigned to a higher expression of genes of  
430 expansin enzyme in rice [65,66], tobacco [67,68] and Arabidopsis [69,70]. The role of  
431 expansins would be to induce the extent of cell wall, generating larger cells, higher  
432 plants and longer roots. So in these cases, the cell expansion associated with the  
433 ploidy is related to the increase of molecular signaling for synthesis of genes of  
434 expansin and may lead to an increase in weight of structures, as in tomato [71].

435

## 436 **Conclusions**

437           The thickness of the leaf blade and the size of the stomata are highly heritable  
438 traits in maize.

439           The obtained high accuracy validates the anatomical tool through the variables  
440 studied in the present work, as a marker in the differentiation of ploidies in maize  
441 plants, which may be employed in programs for selection of hybrids.

442           The anatomy made in young leaves of maze is a non-destructible technique  
443 and in conjunction with the technique of flow cytometry, can be used as indirect method  
444 in programs to obtain double haploids, in the initial stage of identification of seedlings.

445

## 446 **Conflicts of interest**

447           The authors declare no conflict of interest.

448

## 449 **Funding sources**

450           CNPq, CAPES, Fapemig and Universidade Federal de Lavras.

## 451 **Author Contributions**

452 **Conceptualization:** RMOP HOS EVRVP

453 **Formal analysis:** RMOP GAS

454 **Funding acquisition:** EVRVP

455 **Investigation:** RMOP GAS DRV RCCV

456 **Writing:** RMOP DRV RCCV

457

## 458 **References**

- 459 1. Bordes J, Charmet G, de Vaulx R., Pollacsek M, Beckert M, Gallais A.  
460 Doubled haploid vesus S1 family recurrent selection for testcross  
461 performance in a maize population. Theor Appl Genet. 2006;112: 1063–  
462 1072. doi:10.1007/s00122-006-0208-3
- 463 2. Melchinger AE, Schipprack W, Würschum T, Chen S, Technow F. Rapid  
464 and accurate identification of in vivo-induced haploid seeds based on oil  
465 content in maize. Sci Rep. 2013;3: 2129. doi:10.1038/srep02129
- 466 3. Prasanna BM, Chaikam V, Mahuku G. Doubled haploid technology in  
467 maize breeding: theory and practice. Texcoco: CIMMYT; 2012.
- 468 4. Chaikam V, Lopez LA, Martinez L, Burgueño J, Boddupalli PM.  
469 Identification of in vivo induced maternal haploids in maize using seedling  
470 traits. Euphytica. 2017;213: 177. doi:10.1007/s10681-017-1968-3
- 471 5. Ren R, Wu P, Tian X, Lübberstedt T, Chen S. QTL mapping for haploid  
472 male fertility by a segregation distortion method and fine mapping of a key  
473 QTL qhmf4 in maize. Theor Appl Genet. 2017;130: 1349–1359.  
474 doi:10.1007/s00122-017-2892-6
- 475 6. Eeckhaut TGR, Werbrouck SPO, Leus LWH, Van Bockstaele EJ,

- 476 Debergh PC. Chemically induced polyploidization in *Spathiphyllum wallisii*  
477 Regel through somatic embryogenesis. *Plant Cell Tissue Organ Cult.*  
478 2004;78: 241–246. doi:10.1023/B:TICU.0000025659.19232.04
- 479 7. Schifino-Wittmann MT, Dall’Agnol M. Indução de poliploidia no  
480 melhoramento de plantas. *Pesq Agrop Gaúcha.* 2003;9: 155–164.
- 481 8. Dhooghe E, Van Laere K, Eeckhaut T, Leus L, Huylenbroeck JV. Mitotic  
482 chromosome doubling of plant tissues in vitro. *Plant Cell Tiss Organ Cult.*  
483 2011;104: 359–373. doi:10.1007/s11240-010-9786-5
- 484 9. Fritsche-Neto R, Garbuglio DD, Borém A. Duplo-haploides. *Biotechnologia*  
485 *aplicado ao melhoramento de plantas.* Viçosa: UFV; 2012. pp. 267–301.
- 486 10. Battistelli G., Von Pinho RG, Justus A, Couto EG., Balestre M. Production  
487 and identification of doubled haploids in tropical maize. *Genet Mol Res.*  
488 2013;12: 4230–4242. doi:10.4238/2013.October.7.9
- 489 11. Couto EGO, Pinho EVRV, Pinho RGV, Carvalho MR, Bustamante FO,  
490 Nascimento MS. Verification and characterization of chromosome  
491 duplication in haploid maize. *Genet Mol Res.* 2015;14: 6999–7007.  
492 doi:10.4238/2015.June.26.9
- 493 12. Dang NC, Munsch M, Aulinger I, Renlai W, Stamp P. Inducer line  
494 generated double haploid seeds for combined waxy and opaque 2 grain  
495 quality in subtropical maize (*Zea mays*. L.). *Euphytica.* 2012;183: 153–  
496 160. doi:10.1007/s10681-011-0423-0
- 497 13. Lambers H, Chapin FS, Pons TL. *Plant physiological ecology.* New York:  
498 Springer-Verlag; 2008. doi:10.1007/978-0-387-78341-3
- 499 14. Jokela A, Sarjala T, Huttunen S. The structure and hardening status of  
500 Scots pine needles at different potassium availability levels. *Trees.*

- 501 1998;12: 490–498. doi:10.1007/s004680050179
- 502 15. Bosabalidis A., Kofidis G. Comparative effects of drought stress on leaf  
503 anatomy of two olive Cultivars. *Plant Sci.* 2002;163: 375–379.  
504 doi:[https://doi.org/10.1016/S0168-9452\(02\)00135-8](https://doi.org/10.1016/S0168-9452(02)00135-8)
- 505 16. Oksanen EJ. Increasing tropospheric ozone level reduced birch (*Betula*  
506 *pendula*) dry mass within a five years period. *Water, Air Soil Pollut.*  
507 2001;130: 947–952. doi:[https://doi.org/10.1007/978-94-007-0810-5\\_5](https://doi.org/10.1007/978-94-007-0810-5_5)
- 508 17. Oksanen E, Häikiö E, Sober J, Karnosky D. Ozone-induced H<sub>2</sub>O<sub>2</sub>  
509 accumulation in field-grown aspen and birch is linked to foliar  
510 ultrastructure and peroxisomal activity. *New Phytol.* 2004;161: 791–799.  
511 doi:<https://doi.org/10.1111/j.1469-8137.2003.00981.x>
- 512 18. Ramalho MAP, Santos JB, Pinto CABP. *Genética na agropecuária.*  
513 Lavras: UFLA; 2012.
- 514 19. Vichiato MRV, Vichiato M, Moacir P, Castro DM, Dutra LF. Indução e  
515 identificação de tetraplóides em *Dendrobium nobile* Lindl. (Orchidaceae).  
516 *Rev Ciênc Agron.* 2007;38: 385–390.
- 517 20. Mishra MK. Stomatal Characteristics at Different Ploidy Levels in *Coffea*  
518 *L.* *Ann Bot.* 1997;80: 689–692.  
519 doi:<https://doi.org/10.1006/anbo.1997.0491>
- 520 21. Padoan D, Mossad A, Chiancone B, Germana MA, Khan PSSV. Ploidy  
521 levels in *Citrus clementine* affects leaf morphology, stomatal density and  
522 water content. *Theor Exp Plant Physiol.* 2013;25: 283–290.  
523 doi:<http://dx.doi.org/10.1590/S2197-00252013000400006>
- 524 22. Rocha S. *Caracterização de híbridos triploides espontâneos de citros.*  
525 Instituto Agronômico de Campinas. 2014.

- 526 23. Couto EGO, Pinho EVRV, Pinho RGV, Veiga AD, Bustamante FO, Dias  
527 KOG. In vivo haploid induction and efficiency of two chromosome  
528 duplication protocols in tropical maize. *Ciênc e Agrotec*. 2015;39: 435–  
529 442. doi:<http://dx.doi.org/10.1590/S1413-70542015000500002>
- 530 24. Chase SS, Nanda DK. Comparison of variability in inbred lines and  
531 monoploid-derived lines of maize (*Zea mays* L.). *Crop Sci*. 1965;5: 275–  
532 276.
- 533 25. Dolezel J. Current topics in plant cytogenetics related to plant  
534 improvement. Current topics in plant cytogenetics related to plant  
535 improvement. Vienna: WUV-Universitätsverlag; 1997. pp. 80–90.
- 536 26. Johansen DA. Plant microtechnique. New York: McGraw-Hill; 1940.
- 537 27. O'Brien T, Feder N, McCully ME. Polychromatic staining of plant cell walls  
538 by toluidine blue. *O Protoplasma*. 1964;59: 367–373.  
539 doi:[10.1007/BF01248568](https://doi.org/10.1007/BF01248568)
- 540 28. Zsögön A, Negrini ACA, Peres LEP, Nguyen HT, Ball MC. A mutation that  
541 eliminates bundle sheath extensions reduces leaf hydraulic conductance,  
542 stomatal conductance and assimilation rates in tomato (*Solanum*  
543 *lycopersicum*). *New Phytol*. 2014;205: 618–626. doi:[10.1111/nph.13084](https://doi.org/10.1111/nph.13084)
- 544 29. Resende MDV. Software SELEGEN – REML/BLUP: Sistema estatístico e  
545 seleção computadorizada via modelos lineares mistos. Colombo:  
546 EMBRAPA Florestas; 2007.
- 547 30. Resende MDV de. Matemática e estatística na análise de experimentos e  
548 no melhoramento genético. Colombo: Embrapa Florestas; 2007.
- 549 31. Resende MDV, Duarte JB. Precisão e controle de qualidade em  
550 experimentos de avaliação de cultivares. *Pesq Agropec Trop*. 2007;37:

- 551 182–194.
- 552 32. Falconer DS, Mackay TFC. Introduction to quantitative genetics. Harlow:  
553 Burnt Mill; 1996.
- 554 33. Ribeiro CB. Estratégias para obtenção de duplo-haploides e progênes  
555 indutoras de haploidia em milho. Universidade Federal de Lavras. 2016.
- 556 34. Silva MR, Pinheiro RV, Christoforo AL, Panzerad TH, Lahr FAR. Hybrid  
557 Sandwich Particleboard Made with Sugarcane, Pínus Taeda Thermally  
558 Treated and Malva Fibre from Amazon. Mater Res. 2017;21.  
559 doi:<http://dx.doi.org/10.1590/1980-5373-mr-2017-0724>.
- 560 35. Martins SVC, Galmés J, Cavatte PC, Pereira LF, Ventrella MC, DaMatta  
561 FM. Understanding the low photosynthetic rates of sun and shade coffee  
562 leaves: Bridging the gap on the relative roles of hydraulic, diffusive and  
563 biochemical constraints to photosynthesis. PLoS One. 2014;9: e95571.  
564 doi:<https://doi.org/10.1371/journal.pone.0095571>
- 565 36. Cochrane JA, Hoyle GL, Yates CJ, Wood J, Nicotra AB. Evidence of  
566 population variation in drought tolerance during seed germination in four  
567 Banksia (Proteaceae) species from Western Australia. Aust J Bot.  
568 2014;62: 481–489. doi:10.1071/BT14132
- 569 37. Taiz L, Zeiger E. Plant Physiology. 5th ed. Sunderland: Sinauer  
570 Associates; 2015.
- 571 38. Lawson T, Blatt MR. Stomatal size, speed, and responsiveness impact on  
572 photosynthesis and water use efficiency. Plant Physiol. 2014;164: 1556–  
573 1570. doi:<https://doi.org/10.1104/pp.114.237107>
- 574 39. Dow GJ, Bergmann DC, Berry JA. An integrated model of stomatal  
575 development and leaf physiology. New Phytol. 2014;201: 1218–1226.



- 576 doi:10.1111/nph.12608
- 577 40. Hetherington AM, Woodward FI. The role of stomata in sensing and  
578 driving environmental change. *Nature*. 2003;424: 901–908.  
579 doi:10.1038/nature01843
- 580 41. Franks PJ, Farquhar GD. The mechanical diversity of stomata and its  
581 significance in gas-exchange control. *Plant Physiol*. 2007;143: 78–87.  
582 doi:<https://doi.org/10.1104/pp.106.089367>
- 583 42. Gray JE, Holroyd GH, Van der Lee FM, Bahrami AR, Sijmons PC,  
584 Woodward FI, et al. The HIC signalling pathway links CO<sub>2</sub> perception to  
585 stomatal development. *Nature*. 2000;408: 713–716.  
586 doi:10.1038/35047071
- 587 43. Gay AP, Hurd RG. The influence of light on stomatal density in the  
588 tomato. *New Phytol*. 1975;75: 37–46. doi:[https://doi.org/10.1111/j.1469-](https://doi.org/10.1111/j.1469-8137.1975.tb01368.x)  
589 [8137.1975.tb01368.x](https://doi.org/10.1111/j.1469-8137.1975.tb01368.x)
- 590 44. P.L. D, Froend RH, Franks PJ. Smaller, faster stomata: scaling of  
591 stomatal size, rate of response, and stomatal conductance. *J Exp Bot*.  
592 2013;64: 495–505. doi:10.1093/jxb/ers347
- 593 45. Jones HG. Transpiration in barley lines with differing stomatal  
594 frequencies. *J Exp Bot*. 1977;23: 162–168.  
595 doi:<https://doi.org/10.1093/jxb/28.1.162>
- 596 46. Schluter U, Muschak M, Berger D, Altmann T. Photosynthetic performance  
597 of an *Arabidopsis* mutant with elevated stomatal density (sdd1-1) under  
598 different light regimes. *J Exp Bot*. 2003;54: 867–874.  
599 doi:10.1093/jxb/erg087
- 600 47. Yoon S, Aucar S, Hernlem BJ, Edme S, Palmer N, Sarath G, et al.



- 626           barley.                           1970.                           8AD;10:                           575–578.  
627           doi:doi:10.2135/cropsci1970.0011183X001000050038x
- 628   56.   Chia AJ, Brun WA. Stomatal size and frequency in soybeans. *Crop Sci.*  
629           1975; 309–313. doi:10.2135/cropsci1975.0011183X001500030008
- 630   57.   Teare ID, Peterson CJ, Law AG. Size and frequency of leaf stomata in  
631           cultivars of *Triticum aestivum* and other *Triticum* species. *Crop Sci.*  
632           1971;11: 496–498. doi:10.2135/cropsci1971.0011183X001100040010x
- 633   58.   Sapra VT, Hughes JL, Sharma GC. Frequency, size and distribution of  
634           stomata in triticale leaves. *Crop Sci.* 1975;15: 356–358.  
635           doi:10.2135/cropsci1975.0011183X001500030022x
- 636   59.   Farinaci JS. Variabilidade genética em algumas espécies de  
637           *Bulbophyllum Thouars* (Orchidaceae) de campos rupestres. Universidade  
638           Estadual de Campinas. 2001.
- 639   60.   Baker RL, Yarkhunova Y, Vidal K, Ewers BE, Weinig C. Polyploidy and  
640           the relationship between leaf structure and function: implications for  
641           correlated evolution of anatomy, morphology, and physiology in *Brassica*.  
642           *BMC Plant Biol.* 2017;17. doi:10.1186/s12870-016-0957-3
- 643   61.   Giuliani R, Koteyeva N, Voznesenskaya E, Evans MA, Cousins AB,  
644           Edwards GE. Coordination of leaf photosynthesis, transpiration, and  
645           structural traits in rice and wild relatives (genus *Oryza*). *Plant Physiol.*  
646           2013;162: 1632–1651. doi:<https://doi.org/10.1104/pp.113.217497>
- 647   62.   Stupar RM, Bhaskar PB, Yandell BS, Rensink WA, Hart AL, Ouyang S, et  
648           al. Phenotypic and transcriptomic changes associated with potato  
649           autopolyploidization. *Genetics.* 2007;176: 2055–2067.  
650           doi:<https://doi.org/10.1534/genetics.107.074286>

- 651 63. Zhou Y, Kang L, Liao S, Pan Q, Ge X, Li Z. Transcriptomic analysis  
652 reveals differential gene expressions for cell growth and functional  
653 secondary metabolites in induced autotetraploid of Chinese woad (*Isatis*  
654 *indigotica* Fort.). *PLoS One*. 2015;10: e0116392.  
655 doi:<https://doi.org/10.1371/journal.pone.0116392>
- 656 64. Warner DA, Ku MS, Edwards GE. Photosynthesis, leaf anatomy, and  
657 cellular constituents in the polyploid C(4) grass *Panicum virgatum*. *Plant*  
658 *Physiol*. 1987;84: 461–466. doi:10.1104/pp.84.2.461
- 659 65. Lee Y, Choi D. Biochemical Properties and Localization of the  $\beta$ -Expansin  
660 OsEXPB3 in Rice (*Oryza sativa* L.). *Mol Cells*. 2005;20: 119–126.  
661 doi:10.1002/047001539X.ch7
- 662 66. Ma N, Wang Y, Qiu S, Kang Z, Che S, Wang G, et al. Overexpression of  
663 Os EXPA8, a root-specific gene, improves rice growth and root system  
664 architecture by facilitating cell extension. *PLoS One*. 2013;8: e75997.  
665 doi:<https://doi.org/10.1371/journal.pone.0075997>
- 666 67. Li F, Han Y, Feng Y, Xing S, Zhao M, Chen Y, et al. Expression of wheat  
667 expansin driven by the RD29 promoter in tobacco confers waterstress  
668 tolerance without impacting growth and development. *J Biotechnol*.  
669 2013;163: 281–291. doi:10.1016/j.jbiotec.2012.11.008
- 670 68. Xu Q, Xu X, Shi Y, Xu J, Huang B. Transgenic tobacco plants  
671 overexpressing a grass PpEXP1 gene exhibit enhanced tolerance to heat  
672 stress. *PLoS One*. 2014;9: e100792.  
673 doi:<https://doi.org/10.1371/journal.pone.0100792>
- 674 69. Hu Y, Zhu N, Wang X, Yi Q, Zhu D, Lai Y, et al. No Title Analysis of rice  
675 Snf2 family proteins and their potential roles in epigenetic regulation.

676 Plant Physiol Biochem. 2013;70: 33–42.  
677 doi:10.1016/j.plaphy.2013.05.001  
678 70. Goh H, Sloan J, Malinowski R, Fleming A. Variable expansin expression  
679 in Arabidopsis leads to different growth responses. J Plant Physiol.  
680 2014;171: 329–339. doi:10.1016/j.jplph.2013.09.009  
681 71. Cheniclet C, Rong WY, Causse M, Frangne N, Bolling L, Carde JP, et al.  
682 Cell expansion and endoreduplication show a large genetic variability in  
683 pericarp and contribute strongly to tomato fruit growth. Plant Physiol.  
684 2005;139: 1984–1994. doi:<https://doi.org/10.1104/pp.105.068767>  
685  
686  
687

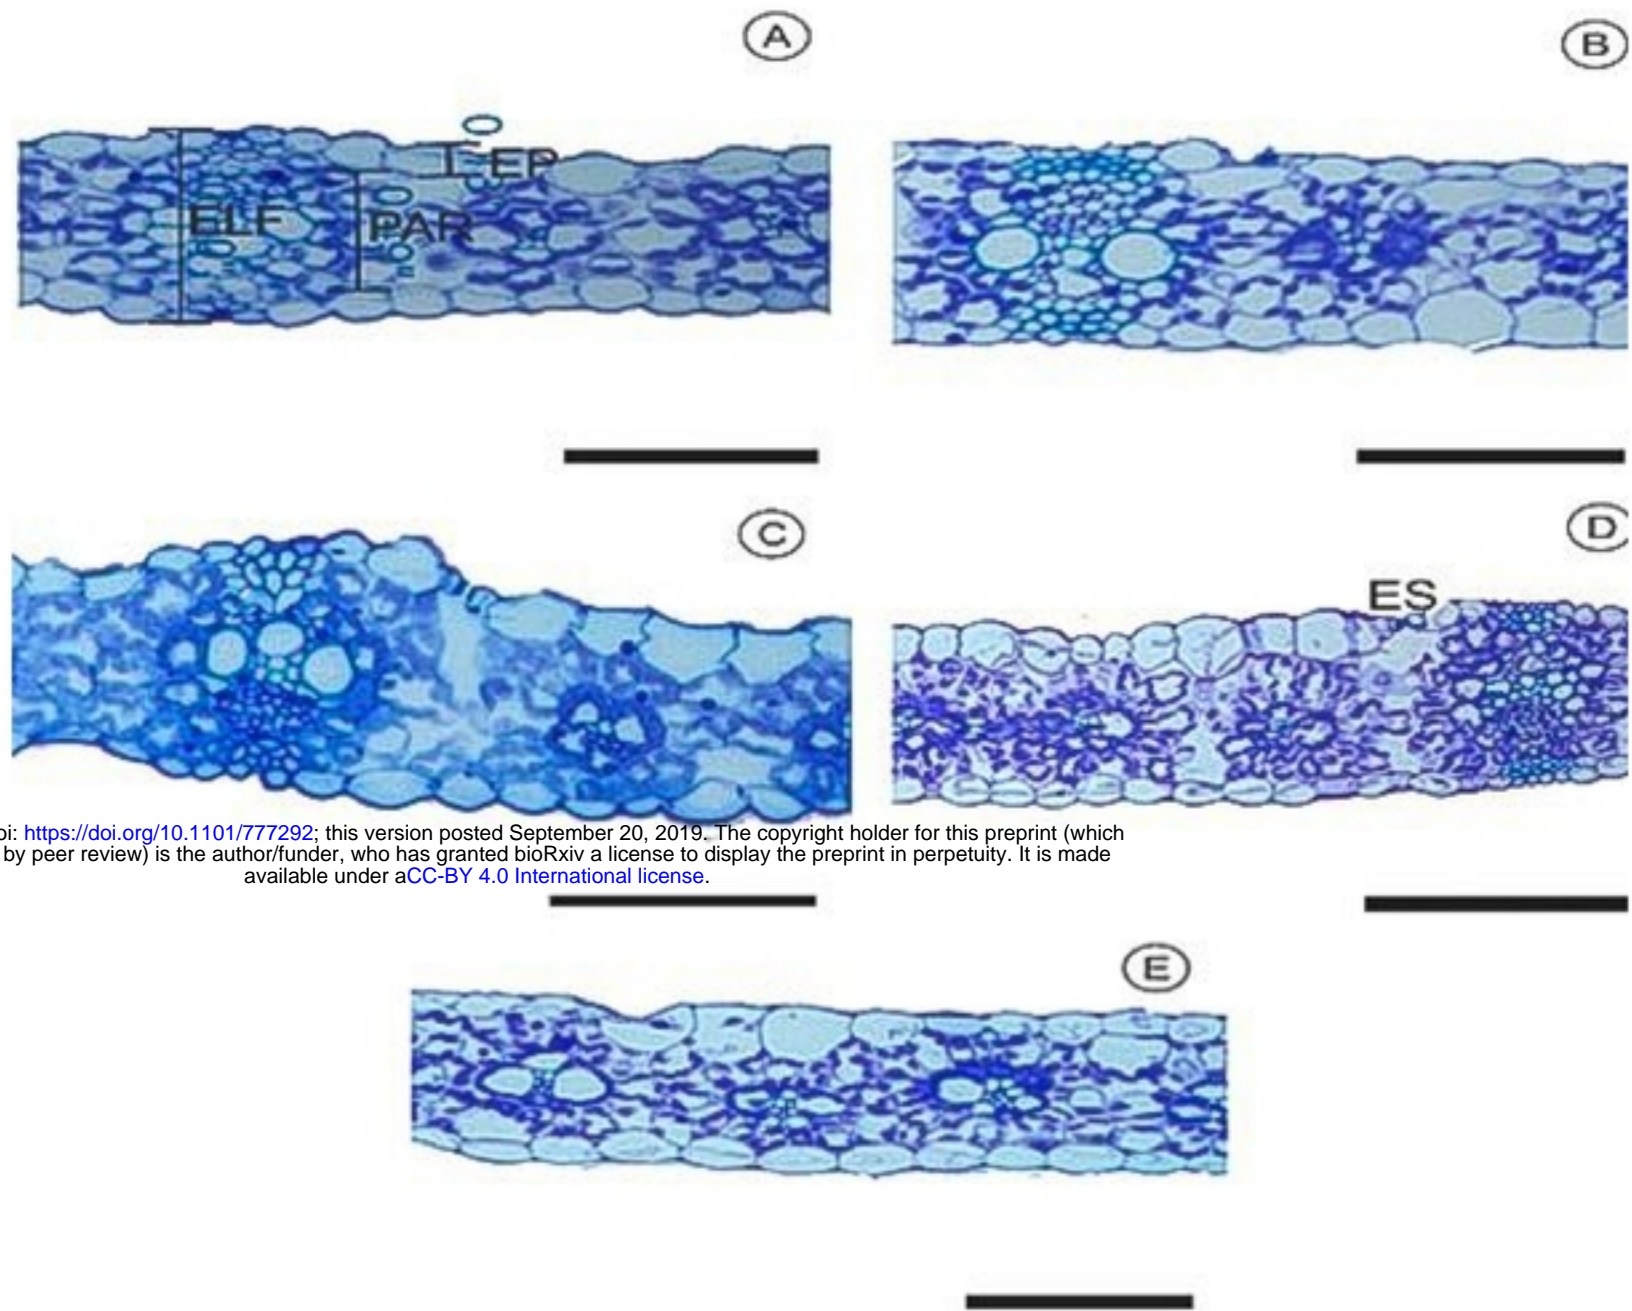

bioRxiv preprint doi: <https://doi.org/10.1101/777292>; this version posted September 20, 2019. The copyright holder for this preprint (which was not certified by peer review) is the author/funder, who has granted bioRxiv a license to display the preprint in perpetuity. It is made available under aCC-BY 4.0 International license.

**Fig 1. Cross-sectional cuts of maze leaves collected after a process of chromosome doubling with use of colchicine. Haploid material (A), diploid (B), Double haploid (C), triploid (D) and tetraploid (E). ELF= thickness of leaf blade, PAR= thickness of parenchyma, EP=epidermis and ES= stomata. The bars represent 50 μm.**

bioRxiv preprint doi: <https://doi.org/10.1101/777292>; this version posted September 20, 2019. The copyright holder for this preprint (which was not certified by peer review) is the author/funder, who has granted bioRxiv a license to display the preprint in perpetuity. It is made available under aCC-BY 4.0 International license.

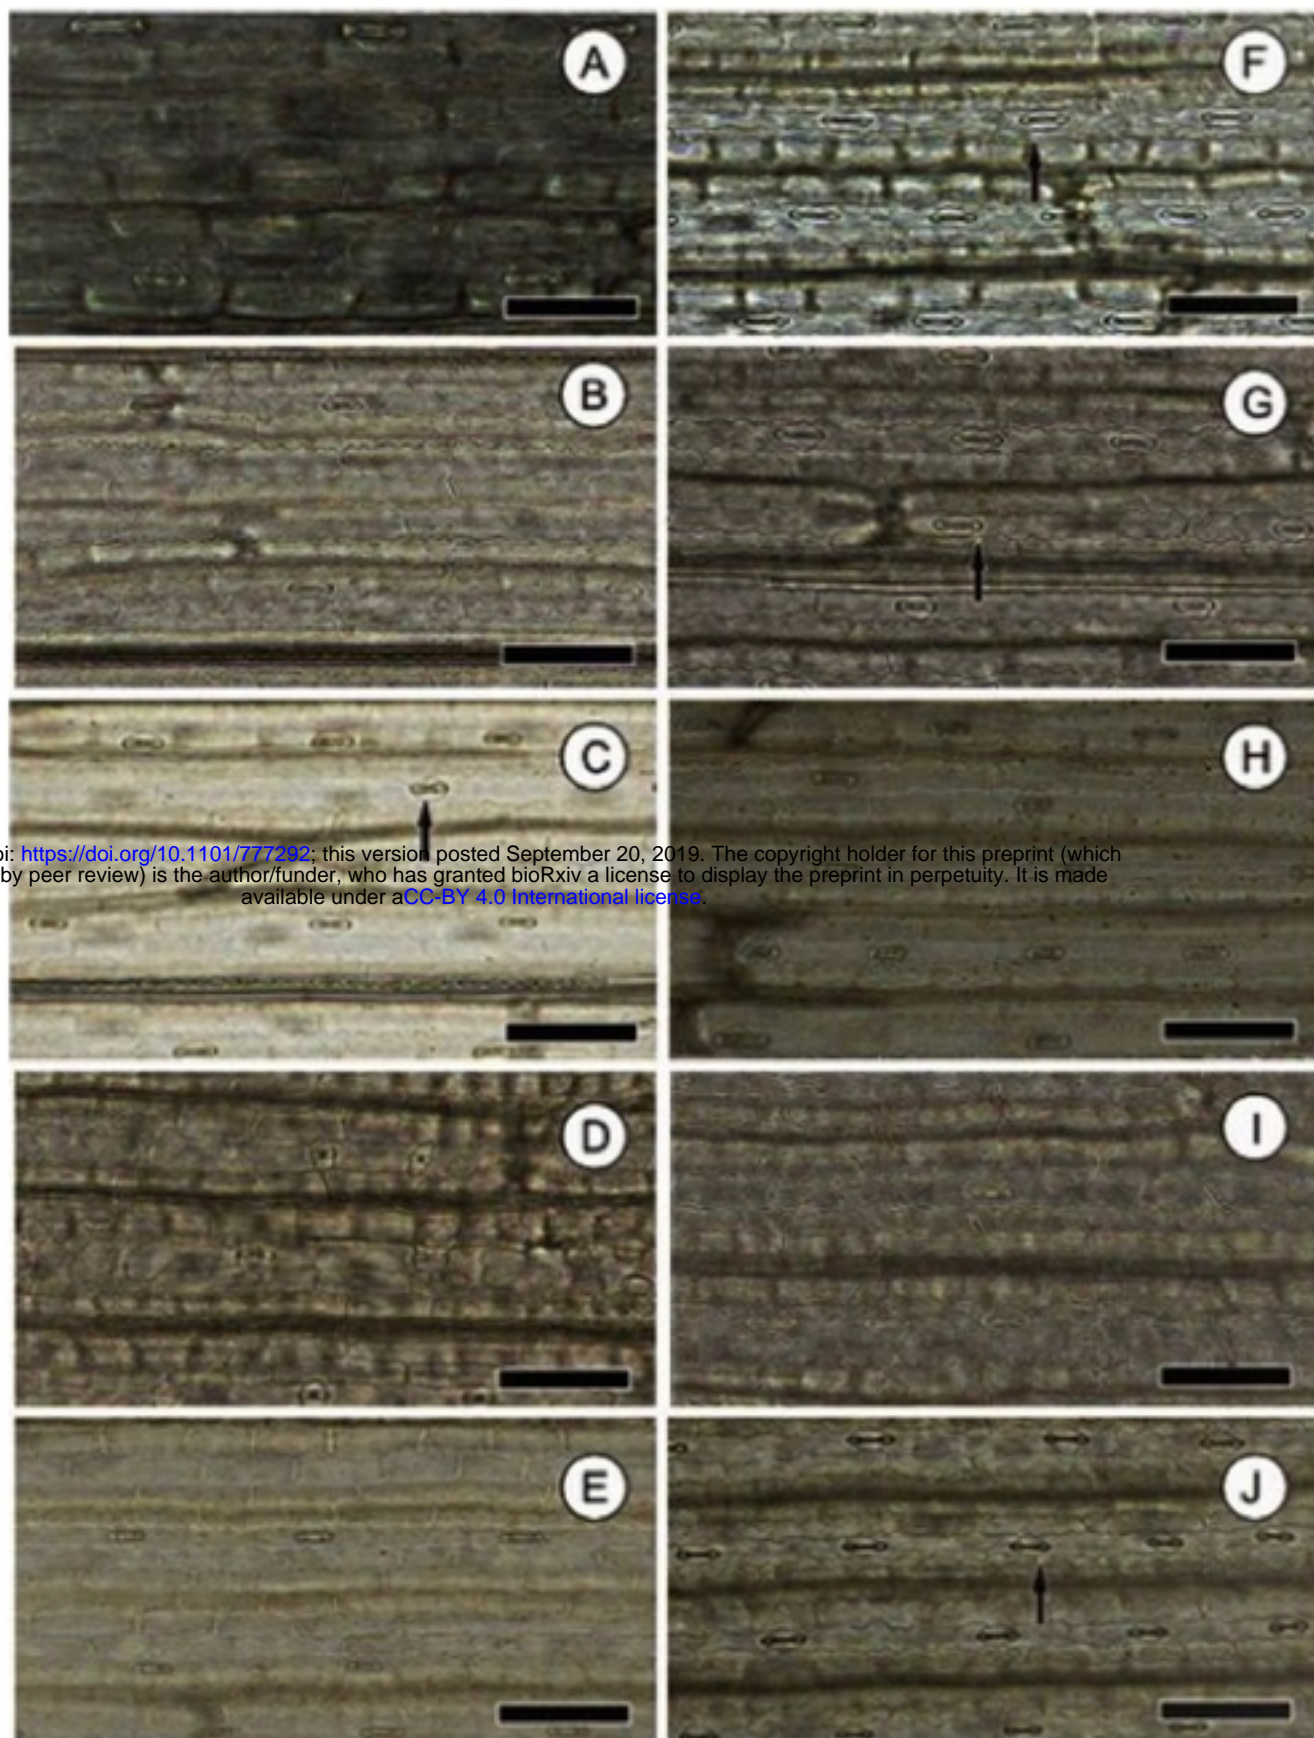

**Fig 2. Adaxial surface (A to E) and abaxial (F through J) of maze leaves collected after a process of chromosome doubling with use of colchicine. Haploid material (A and F), diploid (B and G), Double haploid (C and H), triploid (D and I) and tetraploid (E and J). The bars represent 50  $\mu$ m and arrows indicate stomata.**

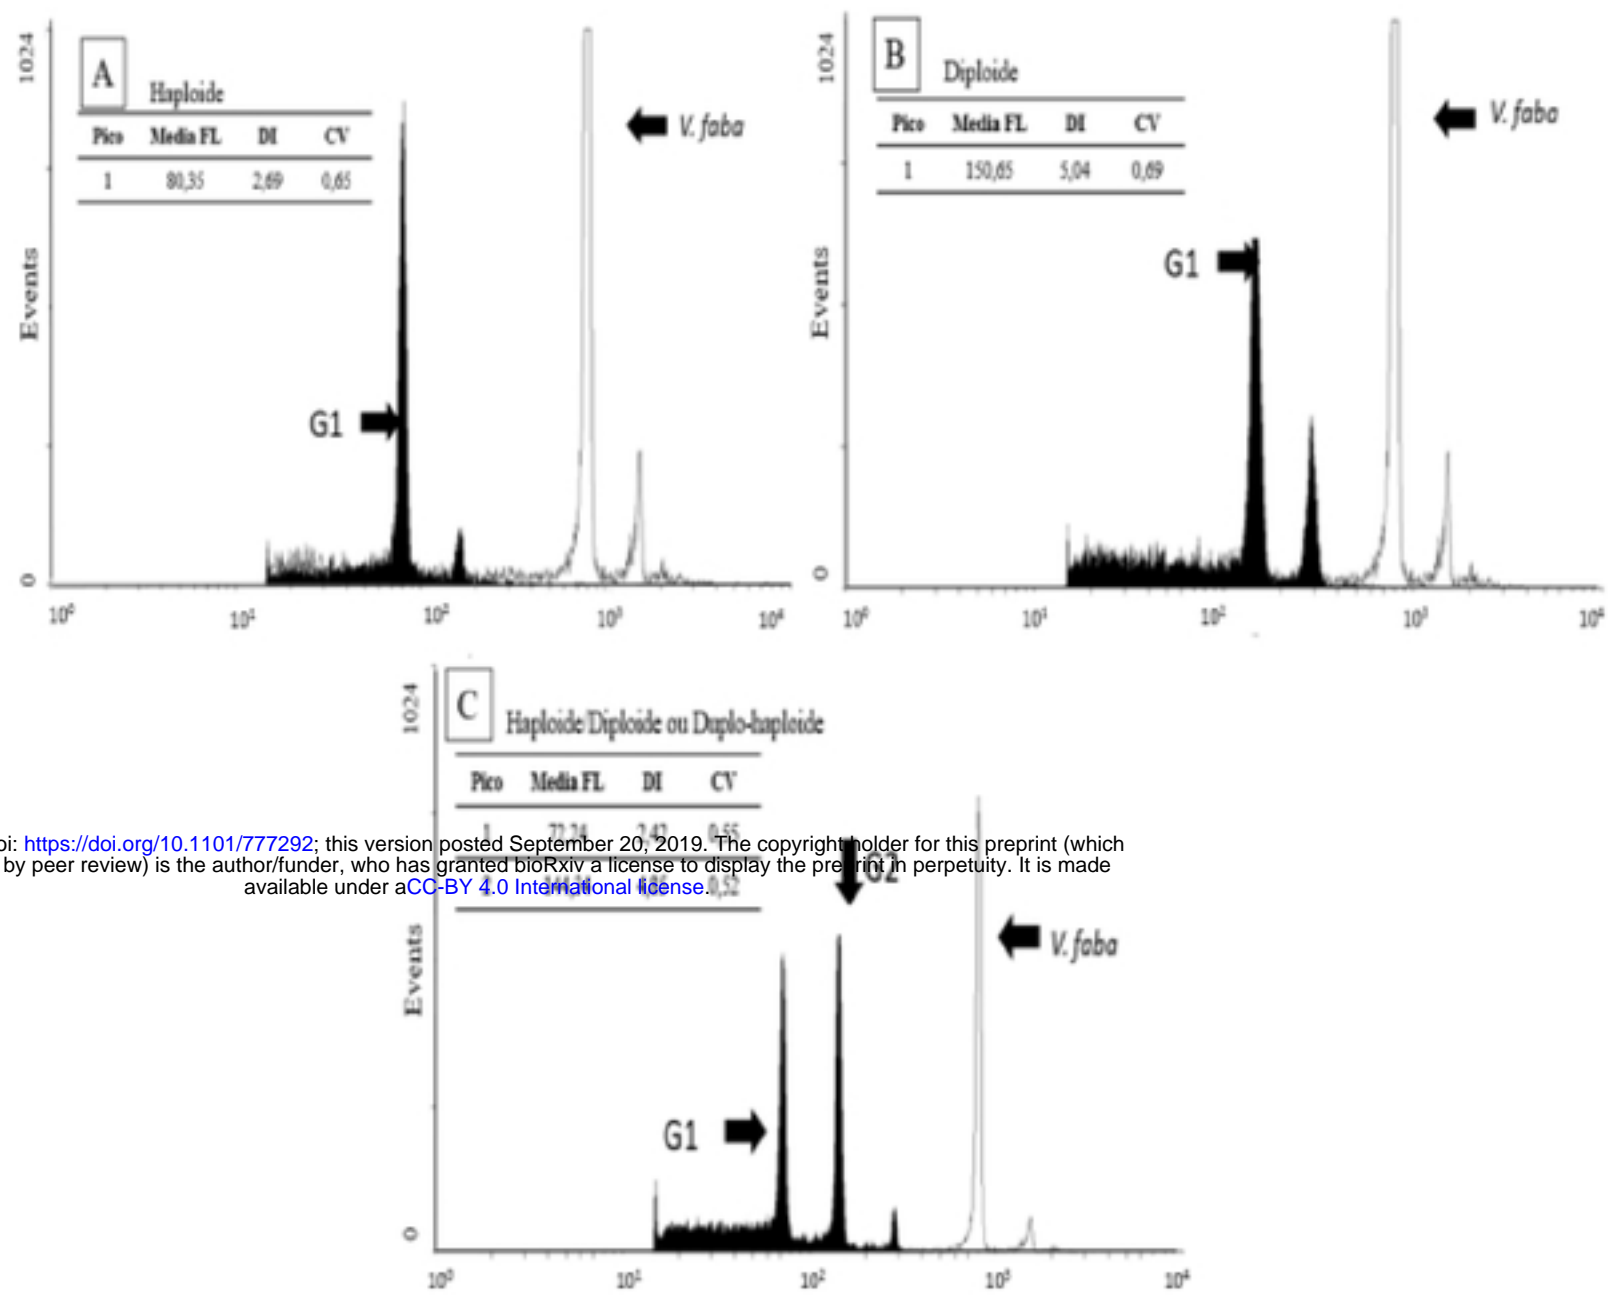

bioRxiv preprint doi: <https://doi.org/10.1101/777292>; this version posted September 20, 2019. The copyright holder for this preprint (which was not certified by peer review) is the author/funder, who has granted bioRxiv a license to display the preprint in perpetuity. It is made available under aCC-BY 4.0 International license.

**Fig 3. The relative importance of the characteristics evaluated in the separation of the valuated materials.**
